# Supplementary material for: Development and validation of an LC-MS/MS method for determination of B vitamins and some its derivatives in whole blood
Source: PubMed Central journal article supplement (PMC9282541; doi:10.1371/journal.pone.0271444), 2022-07-14
Supplement: pone.0271444.s001.pdf [file pone.0271444.s001.pdf]

## Entered data

| Description – Calibration Solution | Val. property – Concentration [µg/L] | Measurement – Peak Area Ratio [1] |
|------------------------------------|--------------------------------------|-----------------------------------|
| Calibration_Standard_001_µg/L      | 1                                    | 0.00352420967286692               |
| Calibration_Standard_001_µg/L      | 1                                    | 0.00336177822353571               |
| Calibration_Standard_001_µg/L      | 1                                    | 0.00342433642745021               |
| Calibration_Standard_002.5_µg/L    | 2.5                                  | 0.00880357271008481               |
| Calibration_Standard_002.5_µg/L    | 2.5                                  | 0.00870137771961254               |
| Calibration_Standard_002.5_µg/L    | 2.5                                  | 0.00860355929554257               |
| Calibration_Standard_005_µg/L      | 5                                    | 0.0191278159017026                |
| Calibration_Standard_005_µg/L      | 5                                    | 0.01873682533173                  |
| Calibration_Standard_005_µg/L      | 5                                    | 0.0176757605507607                |
| Calibration_Standard_010_µg/L      | 10                                   | 0.0378832011982676                |
| Calibration_Standard_010_µg/L      | 10                                   | 0.0364688317673684                |
| Calibration_Standard_010_µg/L      | 10                                   | 0.037304451784498                 |
| Calibration_Standard_025_µg/L      | 25                                   | 0.0967074690612784                |
| Calibration_Standard_025_µg/L      | 25                                   | 0.0924441571147502                |
| Calibration_Standard_025_µg/L      | 25                                   | 0.0939025246901804                |
| Calibration_Standard_050_µg/L      | 50                                   | 0.187167803108529                 |
| Calibration_Standard_050_µg/L      | 50                                   | 0.1821693740576                   |
| Calibration_Standard_050_µg/L      | 50                                   | 0.192537701468484                 |
| Calibration_Standard_100_µg/L      | 100                                  | 0.378149942699267                 |
| Calibration_Standard_100_µg/L      | 100                                  | 0.381546863083519                 |
| Calibration_Standard_100_µg/L      | 100                                  | 0.375539306320656                 |

## Results

| Calculated R | R <sup>2</sup> | Reference R | Calculated QC | Reference QC | Max. acceptable intercept (absolute) | Calculated intercept value | Hypothesis |
|--------------|----------------|-------------|---------------|--------------|--------------------------------------|----------------------------|------------|
| 0.9999       | 0.9997         | 0.99        | 2.0453        | 5            | 20                                   | -0.0006                    | Accepted   |

## Chart

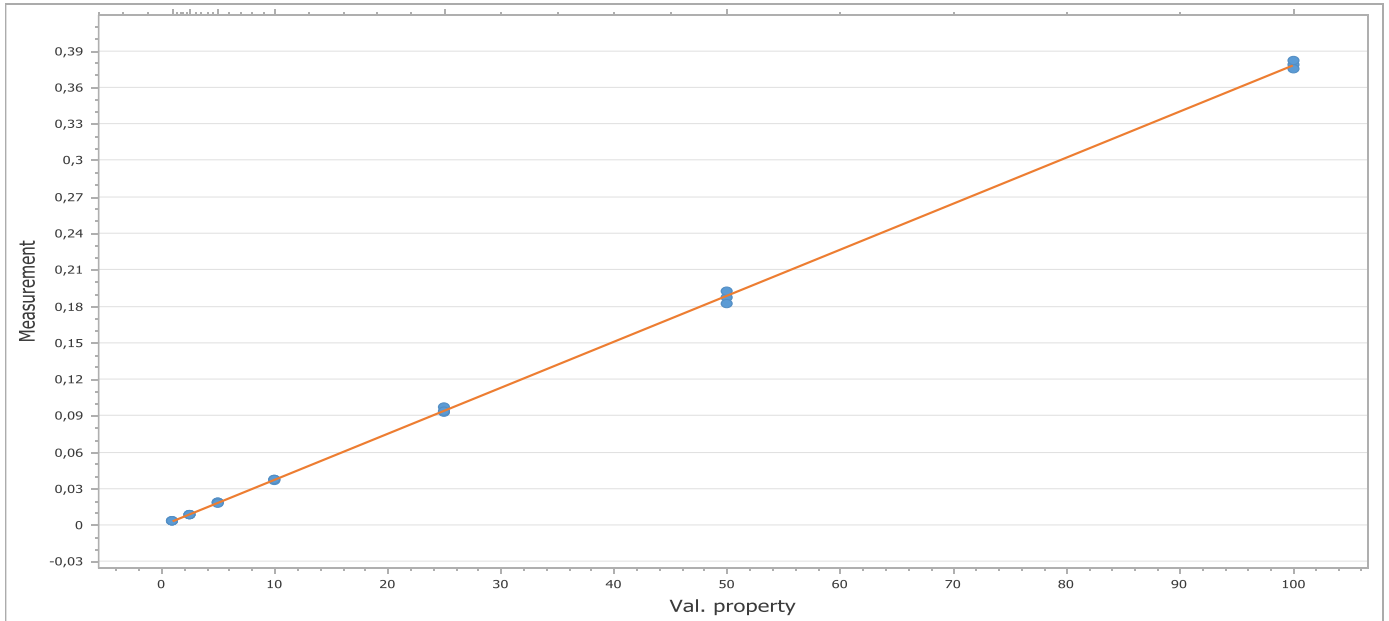

Conclusion: Linearity of the method was confirmed based on correlation and QC Coefficient.

The intercept value of the given straight line meets the acceptance criterion.

Straight line equation:  $y = -0.0006 + 0.0038 * x$ .

Supporting statistics: Intercept (estimate) = -0.000637

Slope (estimate) = 0.003785

Intercept standard deviation (estimate) = 0.000632

Slope standard deviation (estimate) = 1.4E-05

Confidence interval for intercept = (-0.001959) - (0.000686)

Confidence interval for slope = (0.003755) - (0.003815)

Residual variance (estimate) = 5E-06

Residual standard deviation (estimate) = 0.002182

Correlation coefficient = 0.999867

$R^2 = 0.999734$

QC coefficient = 2.045285

## Entered data

| Description – Calibration Solution | Val. property – Concentration [µg/L] | Measurement – Peak Area Ratio [1] |
|------------------------------------|--------------------------------------|-----------------------------------|
| Calibration_Standard_001_µg/L      | 1                                    | 0.00067949680503474               |
| Calibration_Standard_001_µg/L      | 1                                    | 0.000826658241392064              |
| Calibration_Standard_001_µg/L      | 1                                    | 0.000817866125961785              |
| Calibration_Standard_002.5_µg/L    | 2.5                                  | 0.0019673760794822                |
| Calibration_Standard_002.5_µg/L    | 2.5                                  | 0.00186346822923031               |
| Calibration_Standard_002.5_µg/L    | 2.5                                  | 0.00190518445329015               |
| Calibration_Standard_005_µg/L      | 5                                    | 0.00363878840664161               |
| Calibration_Standard_005_µg/L      | 5                                    | 0.0037553971674263                |
| Calibration_Standard_005_µg/L      | 5                                    | 0.00367286773591532               |
| Calibration_Standard_010_µg/L      | 10                                   | 0.0076896060031041                |
| Calibration_Standard_010_µg/L      | 10                                   | 0.00742803868282474               |
| Calibration_Standard_010_µg/L      | 10                                   | 0.00733869869418541               |
| Calibration_Standard_025_µg/L      | 25                                   | 0.0178748265137735                |
| Calibration_Standard_025_µg/L      | 25                                   | 0.0187412538107889                |
| Calibration_Standard_025_µg/L      | 25                                   | 0.0178900235298996                |
| Calibration_Standard_050_µg/L      | 50                                   | 0.0374735481342587                |
| Calibration_Standard_050_µg/L      | 50                                   | 0.0355553552062185                |
| Calibration_Standard_050_µg/L      | 50                                   | 0.0360007974296111                |
| Calibration_Standard_100_µg/L      | 100                                  | 0.0737711948423214                |
| Calibration_Standard_100_µg/L      | 100                                  | 0.0725628009961918                |
| Calibration_Standard_100_µg/L      | 100                                  | 0.0744866673619677                |
| Calibration_Standard_250_µg/L      | 250                                  | 0.1831614113633                   |
| Calibration_Standard_250_µg/L      | 250                                  | 0.185666043681101                 |
| Calibration_Standard_250_µg/L      | 250                                  | 0.182048066400845                 |
| Calibration_Standard_500_µg/L      | 500                                  | 0.367003584668907                 |
| Calibration_Standard_500_µg/L      | 500                                  | 0.36982283288788                  |
| Calibration_Standard_500_µg/L      | 500                                  | 0.364535537435662                 |

## Results

| Calculated R | R <sup>2</sup> | Reference R | Calculated QC | Reference QC | Max. acceptable intercept (absolute) | Calculated intercept value | Hypothesis |
|--------------|----------------|-------------|---------------|--------------|--------------------------------------|----------------------------|------------|
| 1            | 0.9999         | 0.99        | 1.3008        | 5            | 20                                   | 0                          | Accepted   |

## Chart

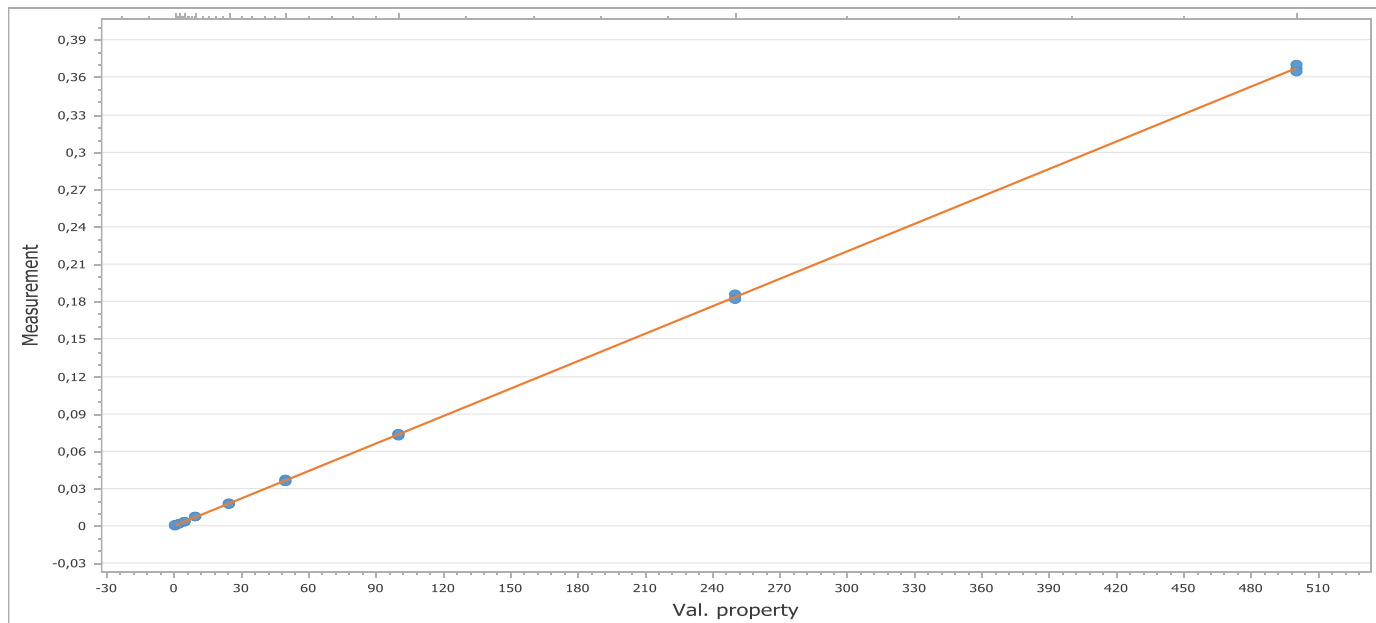

Conclusion: Linearity of the method was confirmed based on correlation and QC Coefficient.

The intercept value of the given straight line meets the acceptance criterion.

Straight line equation:  $y=0+0.0007*x$ .

Supporting statistics: Intercept (estimate)=  $-1.1E-05$

Slope (estimate)=  $0.000734$

Intercept standard deviation (estimate)=  $0.00024$

Slope standard deviation (estimate)=  $1E-06$

Confidence interval for intercept=  $(-0.000505) - (0.000483)$

Confidence interval for slope=  $(0.000732) - (0.000737)$

Residual variance (estimate)=  $1E-06$

Residual standard deviation (estimate)=  $0.001021$

Correlation coefficient=  $0.999964$

$R^2= 0.999929$

QC coefficient=  $1.300821$

## Entered data

| Description – Calibration Solution | Val. property – Concentration [µg/L] | Measurement – Peak Area Ratio [1] |
|------------------------------------|--------------------------------------|-----------------------------------|
| Calibration_Standard_010_µg/L      | 10                                   | 0.0534805424217436                |
| Calibration_Standard_010_µg/L      | 10                                   | 0.0521085261292123                |
| Calibration_Standard_010_µg/L      | 10                                   | 0.0568188312694424                |
| Calibration_Standard_025_µg/L      | 25                                   | 0.138237361176221                 |
| Calibration_Standard_025_µg/L      | 25                                   | 0.132524858454847                 |
| Calibration_Standard_025_µg/L      | 25                                   | 0.132515231697803                 |
| Calibration_Standard_050_µg/L      | 50                                   | 0.281255952560169                 |
| Calibration_Standard_050_µg/L      | 50                                   | 0.277341597389255                 |
| Calibration_Standard_050_µg/L      | 50                                   | 0.274551058994486                 |
| Calibration_Standard_100_µg/L      | 100                                  | 0.56152339751258                  |
| Calibration_Standard_100_µg/L      | 100                                  | 0.553009796961609                 |
| Calibration_Standard_100_µg/L      | 100                                  | 0.554858525006312                 |
| Calibration_Standard_250_µg/L      | 250                                  | 1.44035786839489                  |
| Calibration_Standard_250_µg/L      | 250                                  | 1.41718581780438                  |
| Calibration_Standard_250_µg/L      | 250                                  | 1.40744835621654                  |
| Calibration_Standard_500_µg/L      | 500                                  | 2.8708188882323                   |
| Calibration_Standard_500_µg/L      | 500                                  | 2.85008342010687                  |
| Calibration_Standard_500_µg/L      | 500                                  | 2.79542862137968                  |

## Results

| Calculated R | R <sup>2</sup> | Reference R | Calculated QC | Reference QC | Max. acceptable intercept (absolute) | Calculated intercept value | Hypothesis |
|--------------|----------------|-------------|---------------|--------------|--------------------------------------|----------------------------|------------|
| 0.9999       | 0.9998         | 0.99        | 1.7303        | 5            | 20                                   | -0.0067                    | Accepted   |

## Chart

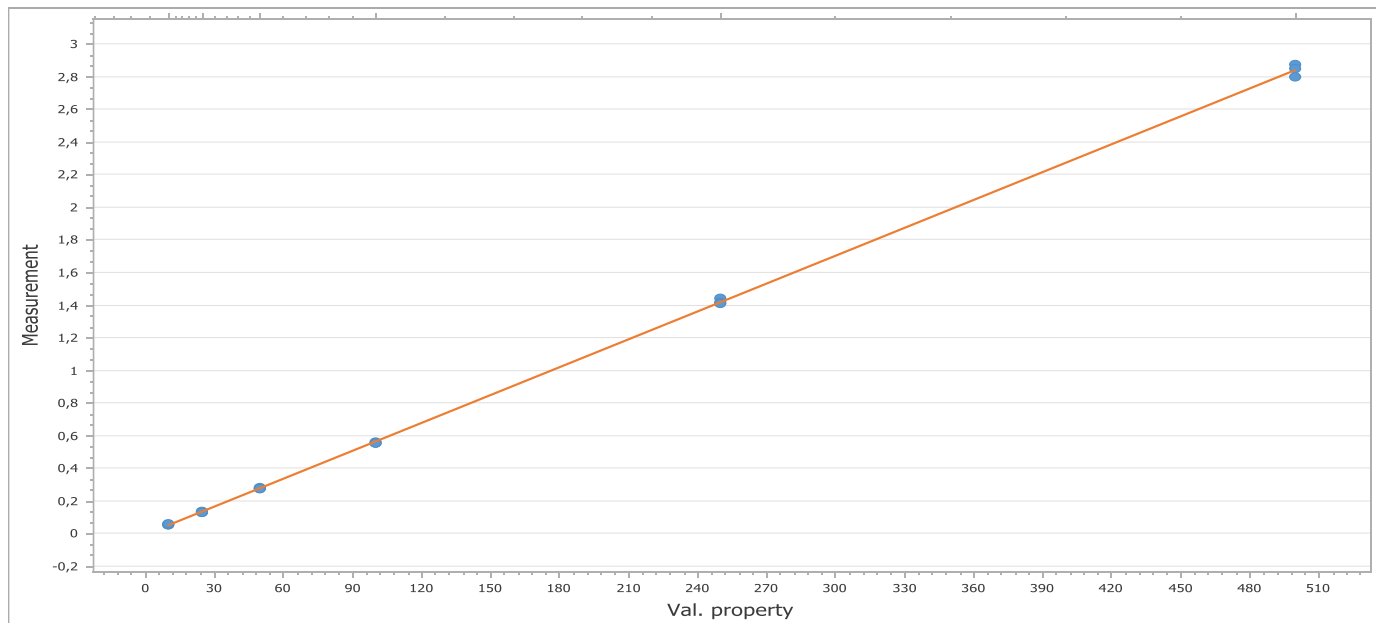

Conclusion: Linearity of the method was confirmed based on correlation and QC Coefficient.

The intercept value of the given straight line meets the acceptance criterion.

Straight line equation:  $y = -0.0067 + 0.0057 * x$ .

Supporting statistics: Intercept (estimate) = -0.006701

Slope (estimate) = 0.005693

Intercept standard deviation (estimate) = 0.005123

Slope standard deviation (estimate) = 2.1E-05

Confidence interval for intercept = (-0.017563) - (0.00416)

Confidence interval for slope = (0.005648) - (0.005739)

Residual variance (estimate) = 0.000247

Residual standard deviation (estimate) = 0.015705

Correlation coefficient = 0.999887

$R^2 = 0.999775$

QC coefficient = 1.730279

## Entered data

| Description – Calibration Solution | Val. property – Concentration [µg/L] | Measurement – Peak Area Ratio [1] |
|------------------------------------|--------------------------------------|-----------------------------------|
| Calibration_Standard_005_µg/L      | 5                                    | 0.135576313062412                 |
| Calibration_Standard_005_µg/L      | 5                                    | 0.128717627025138                 |
| Calibration_Standard_005_µg/L      | 5                                    | 0.131840450005568                 |
| Calibration_Standard_010_µg/L      | 10                                   | 0.23064386358096                  |
| Calibration_Standard_010_µg/L      | 10                                   | 0.23855456868425                  |
| Calibration_Standard_010_µg/L      | 10                                   | 0.241517272615157                 |
| Calibration_Standard_025_µg/L      | 25                                   | 0.541922799607134                 |
| Calibration_Standard_025_µg/L      | 25                                   | 0.544656865911759                 |
| Calibration_Standard_025_µg/L      | 25                                   | 0.549607759292333                 |
| Calibration_Standard_050_µg/L      | 50                                   | 1.04497809486392                  |
| Calibration_Standard_050_µg/L      | 50                                   | 1.07726548696496                  |
| Calibration_Standard_050_µg/L      | 50                                   | 0.998843031861012                 |
| Calibration_Standard_100_µg/L      | 100                                  | 2.0087330185913                   |
| Calibration_Standard_100_µg/L      | 100                                  | 1.96512593607393                  |
| Calibration_Standard_100_µg/L      | 100                                  | 1.9345895100395                   |
| Calibration_Standard_250_µg/L      | 250                                  | 4.9922101173442                   |
| Calibration_Standard_250_µg/L      | 250                                  | 4.71821526906379                  |
| Calibration_Standard_250_µg/L      | 250                                  | 4.71143587998721                  |
| Calibration_Standard_500_µg/L      | 500                                  | 9.64062237762431                  |
| Calibration_Standard_500_µg/L      | 500                                  | 9.84851186495509                  |
| Calibration_Standard_500_µg/L      | 500                                  | 9.65934259614093                  |

## Results

| Calculated R | R <sup>2</sup> | Reference R | Calculated QC | Reference QC | Max. acceptable intercept (absolute) | Calculated intercept value | Hypothesis |
|--------------|----------------|-------------|---------------|--------------|--------------------------------------|----------------------------|------------|
| 0.9998       | 0.9995         | 0.99        | 2.6948        | 5            | 20                                   | 0.0453                     | Accepted   |

## Chart

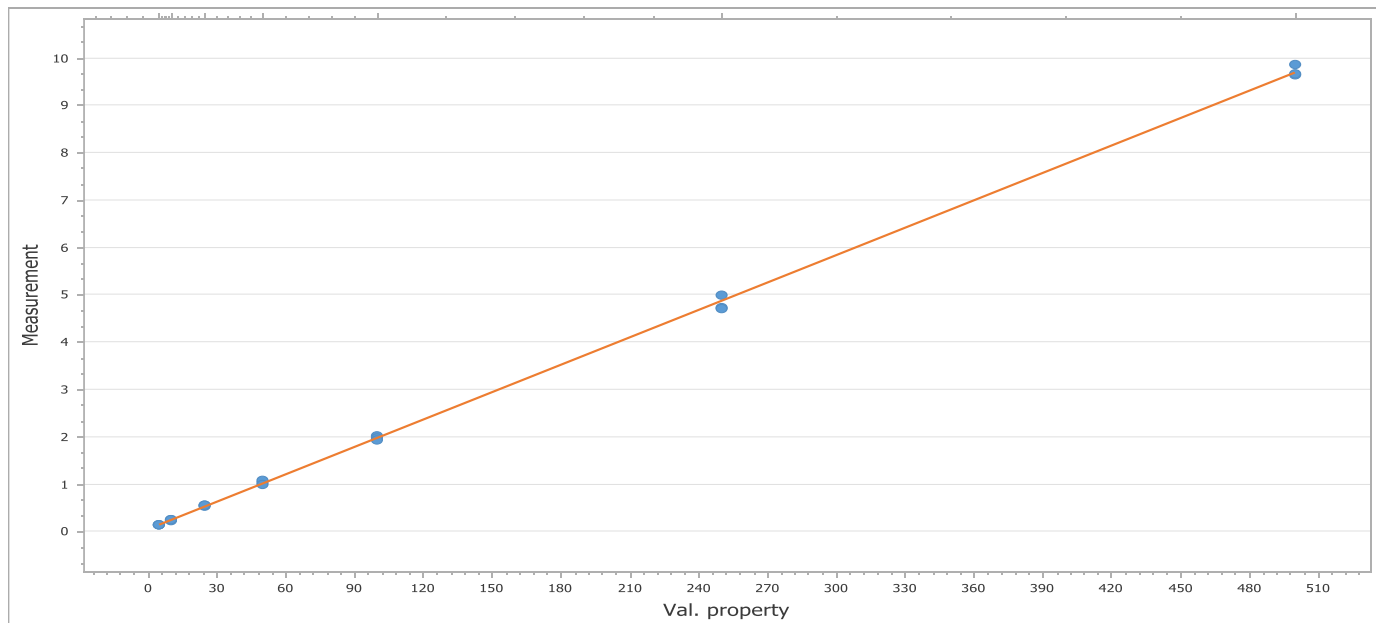

Conclusion: Linearity of the method was confirmed based on correlation and QC Coefficient.

The intercept value of the given straight line meets the acceptance criterion.

Straight line equation:  $y=0.0453+0.0193*x$ .

Supporting statistics: Intercept (estimate)= 0.045335

Slope (estimate)= 0.019288

Intercept standard deviation (estimate)= 0.020818

Slope standard deviation (estimate)= 9.4E-05

Confidence interval for intercept= (0.001763) - (0.088908)

Confidence interval for slope= (0.01909) - (0.019485)

Residual variance (estimate)= 0.005309

Residual standard deviation (estimate)= 0.072863

Correlation coefficient= 0.999774

$R^2= 0.999547$

QC coefficient= 2.694793



## Entered data

| Description – Calibration Solution | Val. property – Concentration [µg/L] | Measurement – Peak Area Ratio [1] |
|------------------------------------|--------------------------------------|-----------------------------------|
| Calibration_Standard_002.5_µg/L    | 2.5                                  | 0.0111048556167835                |
| Calibration_Standard_002.5_µg/L    | 2.5                                  | 0.01134267879741                  |
| Calibration_Standard_002.5_µg/L    | 2.5                                  | 0.010827284901178                 |
| Calibration_Standard_005_µg/L      | 5                                    | 0.0190335159213793                |
| Calibration_Standard_005_µg/L      | 5                                    | 0.0193530497387934                |
| Calibration_Standard_005_µg/L      | 5                                    | 0.0189922380223836                |
| Calibration_Standard_010_µg/L      | 10                                   | 0.0385784487155503                |
| Calibration_Standard_010_µg/L      | 10                                   | 0.0377334713958818                |
| Calibration_Standard_010_µg/L      | 10                                   | 0.0393215102255052                |
| Calibration_Standard_025_µg/L      | 25                                   | 0.0943232098499363                |
| Calibration_Standard_025_µg/L      | 25                                   | 0.0945798650545513                |
| Calibration_Standard_025_µg/L      | 25                                   | 0.0942782748696772                |
| Calibration_Standard_050_µg/L      | 50                                   | 0.182755007847179                 |
| Calibration_Standard_050_µg/L      | 50                                   | 0.183612683804687                 |
| Calibration_Standard_050_µg/L      | 50                                   | 0.182738281459682                 |
| Calibration_Standard_100_µg/L      | 100                                  | 0.37392089727981                  |
| Calibration_Standard_100_µg/L      | 100                                  | 0.364854792155511                 |
| Calibration_Standard_100_µg/L      | 100                                  | 0.372189961946975                 |
| Calibration_Standard_250_µg/L      | 250                                  | 0.920222492598849                 |
| Calibration_Standard_250_µg/L      | 250                                  | 0.914659647673858                 |
| Calibration_Standard_250_µg/L      | 250                                  | 0.916998095093734                 |
| Calibration_Standard_500_µg/L      | 500                                  | 1.83560491705407                  |
| Calibration_Standard_500_µg/L      | 500                                  | 1.84123964916688                  |
| Calibration_Standard_500_µg/L      | 500                                  | 1.83754087663561                  |

## Results

| Calculated R | R <sup>2</sup> | Reference R | Calculated QC | Reference QC | Max. acceptable intercept (absolute) | Calculated intercept value | Hypothesis |
|--------------|----------------|-------------|---------------|--------------|--------------------------------------|----------------------------|------------|
| 1            | 1              | 0.99        | 0.5318        | 5            | 20                                   | 0.0014                     | Accepted   |

## Chart

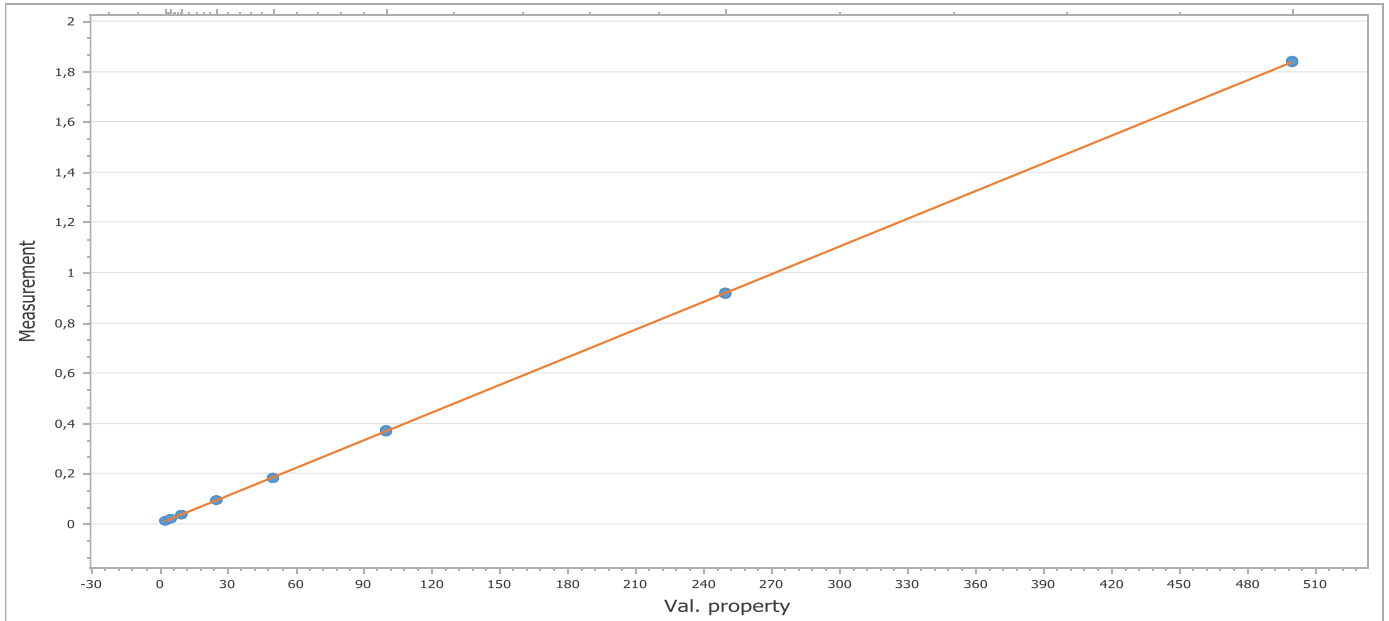

Conclusion: Linearity of the method was confirmed based on correlation and QC Coefficient.

The intercept value of the given straight line meets the acceptance criterion.

Straight line equation:  $y=0.0014+0.0037*x$ .

Supporting statistics: Intercept (estimate)= 0.001407

Slope (estimate)= 0.003672

Intercept standard deviation (estimate)= 0.000606

Slope standard deviation (estimate)= 3E-06

Confidence interval for intercept= (0.00015) - (0.002664)

Confidence interval for slope= (0.003666) - (0.003678)

Residual variance (estimate)= 6E-06

Residual standard deviation (estimate)= 0.00236

Correlation coefficient= 0.999993

$R^2= 0.999986$

QC coefficient= 0.531792

## Entered data

| Description – Calibration Solution | Val. property – Concentration [µg/L] | Measurement – Peak Area Ratio [1] |
|------------------------------------|--------------------------------------|-----------------------------------|
| Calibration_Standard_001_µg/L      | 1                                    | 0.0354954969337963                |
| Calibration_Standard_001_µg/L      | 1                                    | 0.0342293886653154                |
| Calibration_Standard_001_µg/L      | 1                                    | 0.0341418152221134                |
| Calibration_Standard_002.5_µg/L    | 2.5                                  | 0.0969043208169548                |
| Calibration_Standard_002.5_µg/L    | 2.5                                  | 0.102330330734759                 |
| Calibration_Standard_002.5_µg/L    | 2.5                                  | 0.100672891689235                 |
| Calibration_Standard_005_µg/L      | 5                                    | 0.179118832973959                 |
| Calibration_Standard_005_µg/L      | 5                                    | 0.207122620623237                 |
| Calibration_Standard_005_µg/L      | 5                                    | 0.203178155480205                 |
| Calibration_Standard_010_µg/L      | 10                                   | 0.366910924520411                 |
| Calibration_Standard_010_µg/L      | 10                                   | 0.381340737202349                 |
| Calibration_Standard_010_µg/L      | 10                                   | 0.368213408062055                 |
| Calibration_Standard_025_µg/L      | 25                                   | 1.05381761835888                  |
| Calibration_Standard_025_µg/L      | 25                                   | 0.983553949414578                 |
| Calibration_Standard_025_µg/L      | 25                                   | 0.971257012811183                 |
| Calibration_Standard_050_µg/L      | 50                                   | 2.05455856891706                  |
| Calibration_Standard_050_µg/L      | 50                                   | 2.08333430290154                  |
| Calibration_Standard_050_µg/L      | 50                                   | 1.93706545393316                  |
| Calibration_Standard_100_µg/L      | 100                                  | 3.66067256161517                  |
| Calibration_Standard_100_µg/L      | 100                                  | 3.72251110751888                  |
| Calibration_Standard_100_µg/L      | 100                                  | 3.96241666637872                  |
| Calibration_Standard_250_µg/L      | 250                                  | 9.93179845113206                  |
| Calibration_Standard_250_µg/L      | 250                                  | 9.74588241776307                  |
| Calibration_Standard_250_µg/L      | 250                                  | 9.87919837536303                  |
| Calibration_Standard_500_µg/L      | 500                                  | 20.028421295836                   |
| Calibration_Standard_500_µg/L      | 500                                  | 19.5490930982085                  |
| Calibration_Standard_500_µg/L      | 500                                  | 19.4401341207283                  |

## Results

| Calculated R | R <sup>2</sup> | Reference R | Calculated QC | Reference QC | Max. acceptable intercept (absolute) | Calculated intercept value | Hypothesis |
|--------------|----------------|-------------|---------------|--------------|--------------------------------------|----------------------------|------------|
| 0.9998       | 0.9997         | 0.99        | 2.8692        | 5            | 20                                   | -0.0097                    | Accepted   |

## Chart

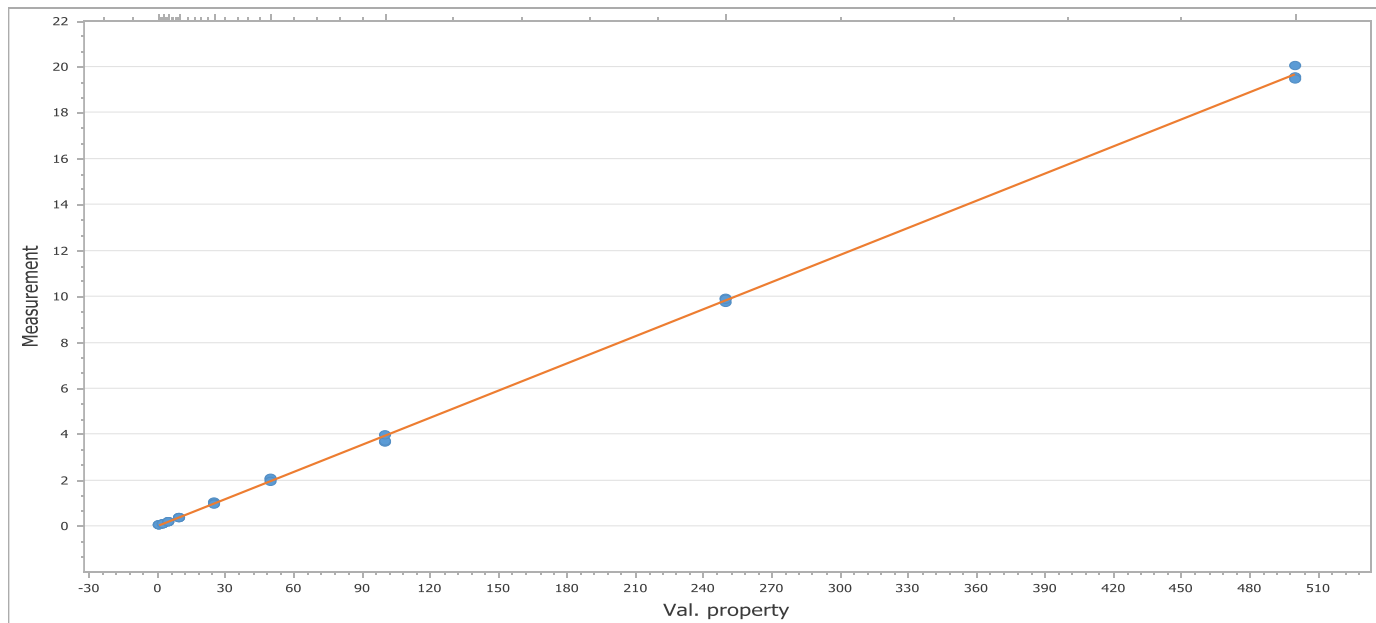

Conclusion: Linearity of the method was confirmed based on correlation and QC Coefficient.

The intercept value of the given straight line meets the acceptance criterion.

Straight line equation:  $y = -0.0097 + 0.0393 \cdot x$ .

Supporting statistics: Intercept (estimate) = -0.009706

Slope (estimate) = 0.039348

Intercept standard deviation (estimate) = 0.028299

Slope standard deviation (estimate) = 0.000146

Confidence interval for intercept = (-0.068003) - (0.048591)

Confidence interval for slope = (0.039048) - (0.039649)

Residual variance (estimate) = 0.0145

Residual standard deviation (estimate) = 0.120416

Correlation coefficient = 0.999828

$R^2 = 0.999656$

QC coefficient = 2.869227

## Entered data

| Description – Calibration Solution | Val. property – Concentration [µg/L] | Measurement – Peak Area Ratio [1] |
|------------------------------------|--------------------------------------|-----------------------------------|
| Calibration_Standard_005_µg/L      | 5                                    | 0.00314260715068839               |
| Calibration_Standard_005_µg/L      | 5                                    | 0.00310317079282196               |
| Calibration_Standard_005_µg/L      | 5                                    | 0.00298028248575365               |
| Calibration_Standard_010_µg/L      | 10                                   | 0.00671231260908685               |
| Calibration_Standard_010_µg/L      | 10                                   | 0.00659421609639534               |
| Calibration_Standard_010_µg/L      | 10                                   | 0.00643321315944531               |
| Calibration_Standard_025_µg/L      | 25                                   | 0.0177065445842402                |
| Calibration_Standard_025_µg/L      | 25                                   | 0.0180677440861674                |
| Calibration_Standard_025_µg/L      | 25                                   | 0.0167865794835273                |
| Calibration_Standard_050_µg/L      | 50                                   | 0.0367231349011293                |
| Calibration_Standard_050_µg/L      | 50                                   | 0.0374790106565063                |
| Calibration_Standard_050_µg/L      | 50                                   | 0.0363451881252027                |
| Calibration_Standard_100_µg/L      | 100                                  | 0.0799855731148707                |
| Calibration_Standard_100_µg/L      | 100                                  | 0.0767620201996312                |
| Calibration_Standard_100_µg/L      | 100                                  | 0.0765771095624044                |
| Calibration_Standard_250_µg/L      | 250                                  | 0.202290148070223                 |
| Calibration_Standard_250_µg/L      | 250                                  | 0.197652952848667                 |
| Calibration_Standard_250_µg/L      | 250                                  | 0.200603746903299                 |
| Calibration_Standard_500_µg/L      | 500                                  | 0.392601615526087                 |
| Calibration_Standard_500_µg/L      | 500                                  | 0.39482782798708                  |
| Calibration_Standard_500_µg/L      | 500                                  | 0.396808599054439                 |

## Results

| Calculated R | R <sup>2</sup> | Reference R | Calculated QC | Reference QC | Max. acceptable intercept (absolute) | Calculated intercept value | Hypothesis |
|--------------|----------------|-------------|---------------|--------------|--------------------------------------|----------------------------|------------|
| 0.9999       | 0.9998         | 0.99        | 1.7609        | 5            | 20                                   | -0.0015                    | Accepted   |

## Chart

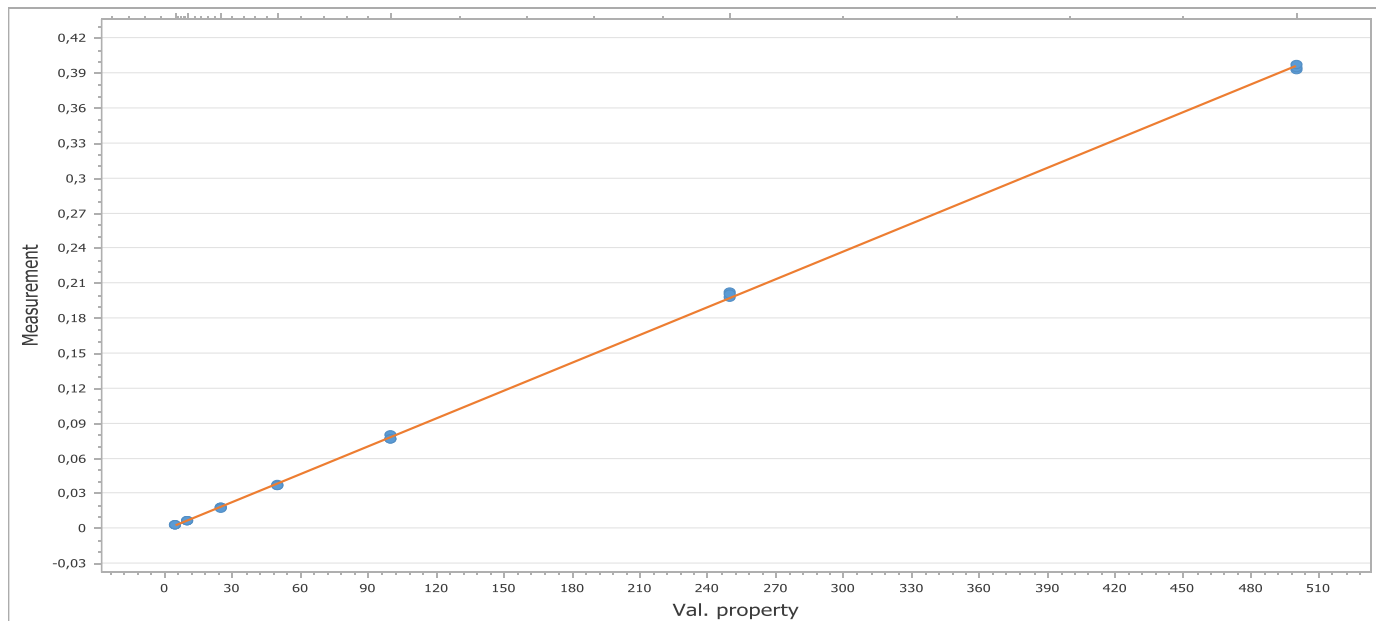

Conclusion: Linearity of the method was confirmed based on correlation and QC Coefficient.

The intercept value of the given straight line meets the acceptance criterion.

Straight line equation:  $y = -0.0015 + 0.0008 * x$ .

Supporting statistics: Intercept (estimate) = -0.001514

Slope (estimate) = 0.000795

Intercept standard deviation (estimate) = 0.000543

Slope standard deviation (estimate) = 2E-06

Confidence interval for intercept = (-0.002651) - (-0.000377)

Confidence interval for slope = (0.00079) - (0.0008)

Residual variance (estimate) = 4E-06

Residual standard deviation (estimate) = 0.001901

Correlation coefficient = 0.999909

$R^2 = 0.999818$

QC coefficient = 1.76086

## Entered data

| Description – Calibration Solution | Val. property – Concentration [µg/L] | Measurement – Peak Area Ratio [1] |
|------------------------------------|--------------------------------------|-----------------------------------|
| Calibration_Standard_001_µg/L      | 1                                    | 0.0238066126443071                |
| Calibration_Standard_001_µg/L      | 1                                    | 0.0206407366425974                |
| Calibration_Standard_001_µg/L      | 1                                    | 0.0200639883197801                |
| Calibration_Standard_002.5_µg/L    | 2.5                                  | 0.050280167851156                 |
| Calibration_Standard_002.5_µg/L    | 2.5                                  | 0.0515143216187237                |
| Calibration_Standard_002.5_µg/L    | 2.5                                  | 0.0500809024078272                |
| Calibration_Standard_005_µg/L      | 5                                    | 0.0856863731204358                |
| Calibration_Standard_005_µg/L      | 5                                    | 0.090719054701818                 |
| Calibration_Standard_005_µg/L      | 5                                    | 0.0924296797322188                |
| Calibration_Standard_010_µg/L      | 10                                   | 0.16297399331002                  |
| Calibration_Standard_010_µg/L      | 10                                   | 0.174183643141146                 |
| Calibration_Standard_010_µg/L      | 10                                   | 0.16749918209186                  |
| Calibration_Standard_025_µg/L      | 25                                   | 0.387313037583545                 |
| Calibration_Standard_025_µg/L      | 25                                   | 0.409464149319182                 |
| Calibration_Standard_025_µg/L      | 25                                   | 0.398953535409165                 |
| Calibration_Standard_050_µg/L      | 50                                   | 0.859904633699983                 |
| Calibration_Standard_050_µg/L      | 50                                   | 0.825036025800485                 |
| Calibration_Standard_050_µg/L      | 50                                   | 0.814775544751228                 |
| Calibration_Standard_100_µg/L      | 100                                  | 1.66895700608554                  |
| Calibration_Standard_100_µg/L      | 100                                  | 1.6122259011589                   |
| Calibration_Standard_100_µg/L      | 100                                  | 1.6465944089692                   |

## Results

| Calculated R | R <sup>2</sup> | Reference R | Calculated QC | Reference QC | Max. acceptable intercept (absolute) | Calculated intercept value | Hypothesis |
|--------------|----------------|-------------|---------------|--------------|--------------------------------------|----------------------------|------------|
| 0.9997       | 0.9993         | 0.99        | 3.1659        | 5            | 20                                   | 0.0048                     | Accepted   |

## Chart

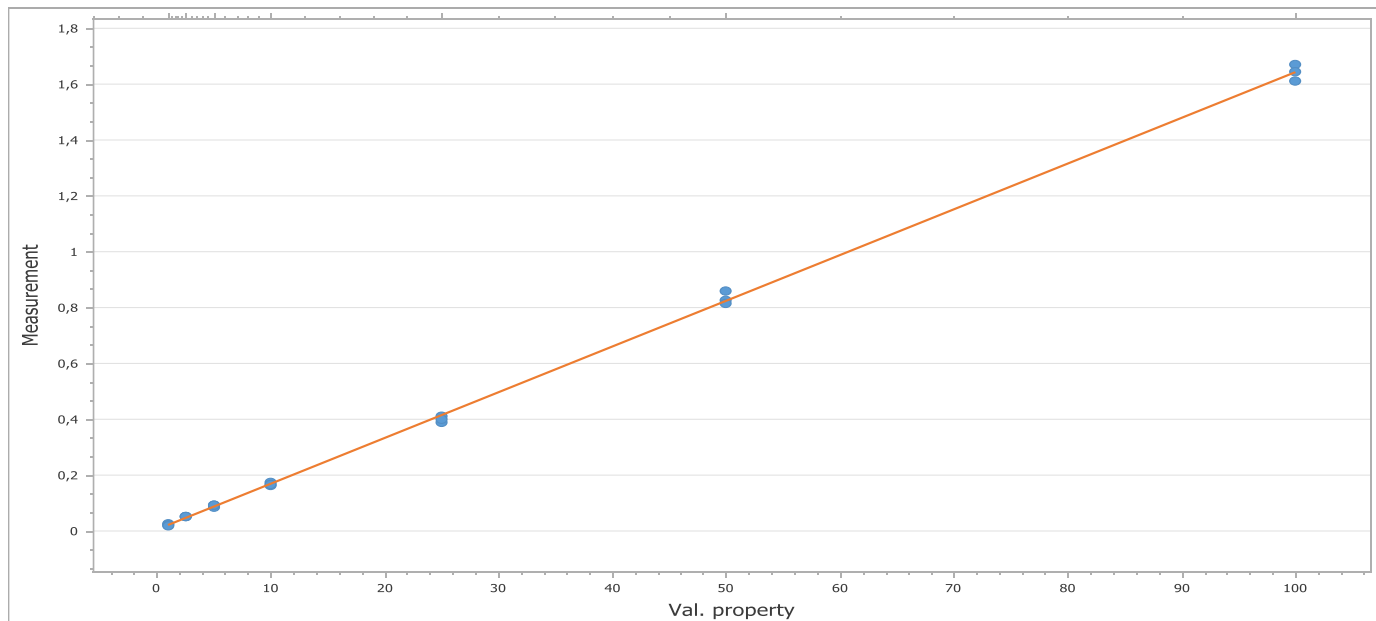

Conclusion: Linearity of the method was confirmed based on correlation and QC Coefficient.

The intercept value of the given straight line meets the acceptance criterion.

Straight line equation:  $y=0.0048+0.0164*x$ .

Supporting statistics: Intercept (estimate)= 0.004812

Slope (estimate)= 0.016386

Intercept standard deviation (estimate)= 0.004305

Slope standard deviation (estimate)= 9.7E-05

Confidence interval for intercept= (-0.004198) - (0.013822)

Confidence interval for slope= (0.016184) - (0.016588)

Residual variance (estimate)= 0.000221

Residual standard deviation (estimate)= 0.014869

Correlation coefficient= 0.99967

$R^2= 0.999341$

QC coefficient= 3.16588



## Entered data

| Description – Calibration Solution | Val. property – Concentration [µg/L] | Measurement – Peak Area Ratio [1] |
|------------------------------------|--------------------------------------|-----------------------------------|
| Calibration_Standard_001_µg/L      | 1                                    | 0.00382242381053133               |
| Calibration_Standard_001_µg/L      | 1                                    | 0.00367432931473915               |
| Calibration_Standard_001_µg/L      | 1                                    | 0.00368578756571579               |
| Calibration_Standard_002.5_µg/L    | 2.5                                  | 0.00901883286801451               |
| Calibration_Standard_002.5_µg/L    | 2.5                                  | 0.00894305006839559               |
| Calibration_Standard_002.5_µg/L    | 2.5                                  | 0.00898244661175238               |
| Calibration_Standard_005_µg/L      | 5                                    | 0.0177107218033038                |
| Calibration_Standard_005_µg/L      | 5                                    | 0.0173609515819469                |
| Calibration_Standard_005_µg/L      | 5                                    | 0.0170617825993446                |
| Calibration_Standard_010_µg/L      | 10                                   | 0.0318556683900235                |
| Calibration_Standard_010_µg/L      | 10                                   | 0.0323742088953014                |
| Calibration_Standard_010_µg/L      | 10                                   | 0.0331018743493365                |
| Calibration_Standard_025_µg/L      | 25                                   | 0.0813219122314418                |
| Calibration_Standard_025_µg/L      | 25                                   | 0.0811156984198693                |
| Calibration_Standard_025_µg/L      | 25                                   | 0.0751894018741628                |
| Calibration_Standard_050_µg/L      | 50                                   | 0.155801722086477                 |
| Calibration_Standard_050_µg/L      | 50                                   | 0.159783439432182                 |
| Calibration_Standard_050_µg/L      | 50                                   | 0.155454018538239                 |
| Calibration_Standard_100_µg/L      | 100                                  | 0.305034390891427                 |
| Calibration_Standard_100_µg/L      | 100                                  | 0.306270253911347                 |
| Calibration_Standard_100_µg/L      | 100                                  | 0.310130873091                    |
| Calibration_Standard_250_µg/L      | 250                                  | 0.783708176290854                 |
| Calibration_Standard_250_µg/L      | 250                                  | 0.771989169740879                 |
| Calibration_Standard_250_µg/L      | 250                                  | 0.783667300121485                 |
| Calibration_Standard_500_µg/L      | 500                                  | 1.544987002955                    |
| Calibration_Standard_500_µg/L      | 500                                  | 1.56483965701252                  |
| Calibration_Standard_500_µg/L      | 500                                  | 1.54877156785035                  |

## Results

| Calculated R | R <sup>2</sup> | Reference R | Calculated QC | Reference QC | Max. acceptable intercept (absolute) | Calculated intercept value | Hypothesis |
|--------------|----------------|-------------|---------------|--------------|--------------------------------------|----------------------------|------------|
| 1            | 0.9999         | 0.99        | 1.2711        | 5            | 20                                   | 0.001                      | Accepted   |

## Chart

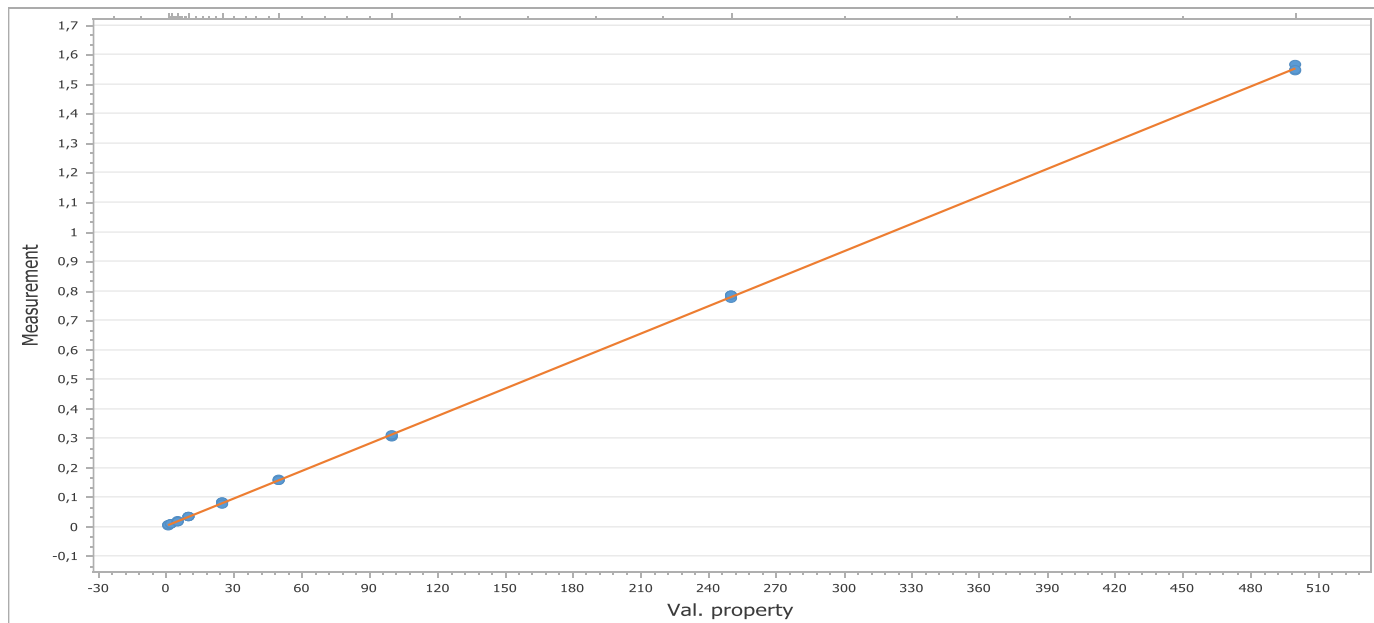

Conclusion: Linearity of the method was confirmed based on correlation and QC Coefficient.

The intercept value of the given straight line meets the acceptance criterion.

Straight line equation:  $y=0.001+0.0031*x$ .

Supporting statistics: Intercept (estimate)= 0.001024

Slope (estimate)= 0.003105

Intercept standard deviation (estimate)= 0.000995

Slope standard deviation (estimate)= 5E-06

Confidence interval for intercept= (-0.001025) - (0.003073)

Confidence interval for slope= (0.003094) - (0.003115)

Residual variance (estimate)= 1.8E-05

Residual standard deviation (estimate)= 0.004232

Correlation coefficient= 0.999966

$R^2= 0.999932$

QC coefficient= 1.271058

## Entered data

| Description – Calibration Solution | Val. property – Concentration [µg/L] | Measurement – Peak Area Ratio [1] |
|------------------------------------|--------------------------------------|-----------------------------------|
| Calibration_Standard_001_µg/L      | 1                                    | 5,10301016042416E-05              |
| Calibration_Standard_001_µg/L      | 1                                    | 5,55618394060633E-05              |
| Calibration_Standard_001_µg/L      | 1                                    | 5,02906423319449E-05              |
| Calibration_Standard_002.5_µg/L    | 2,5                                  | 0,000101776113149417              |
| Calibration_Standard_002.5_µg/L    | 2,5                                  | 0,000114647177892368              |
| Calibration_Standard_002.5_µg/L    | 2,5                                  | 0,000108700073029118              |
| Calibration_Standard_005_µg/L      | 5                                    | 0,000184579760815194              |
| Calibration_Standard_005_µg/L      | 5                                    | 0,000197993676743434              |
| Calibration_Standard_005_µg/L      | 5                                    | 0,000201233687648175              |
| Calibration_Standard_010_µg/L      | 10                                   | 0,000343090987727154              |
| Calibration_Standard_010_µg/L      | 10                                   | 0,000363996461243611              |
| Calibration_Standard_010_µg/L      | 10                                   | 0,000372025774180333              |
| Calibration_Standard_025_µg/L      | 25                                   | 0,000900592605046846              |
| Calibration_Standard_025_µg/L      | 25                                   | 0,000843294106483874              |
| Calibration_Standard_025_µg/L      | 25                                   | 0,000806440249655097              |
| Calibration_Standard_050_µg/L      | 50                                   | 0,00162389761075021               |
| Calibration_Standard_050_µg/L      | 50                                   | 0,00173025668885529               |
| Calibration_Standard_050_µg/L      | 50                                   | 0,00170073401280075               |
| Calibration_Standard_100_µg/L      | 100                                  | 0,00341787472271494               |
| Calibration_Standard_100_µg/L      | 100                                  | 0,00334642142096616               |
| Calibration_Standard_100_µg/L      | 100                                  | 0,0033018676166793                |

## Results

| Calculated R | R <sup>2</sup> | Reference R | Calculated QC | Reference QC | Max. acceptable intercept (absolute) | Calculated intercept value | Hypothesis |
|--------------|----------------|-------------|---------------|--------------|--------------------------------------|----------------------------|------------|
| 0,9997       | 0,9993         | 0,99        | 3,2139        | 5            | 20                                   | 0                          | Accepted   |

## Chart

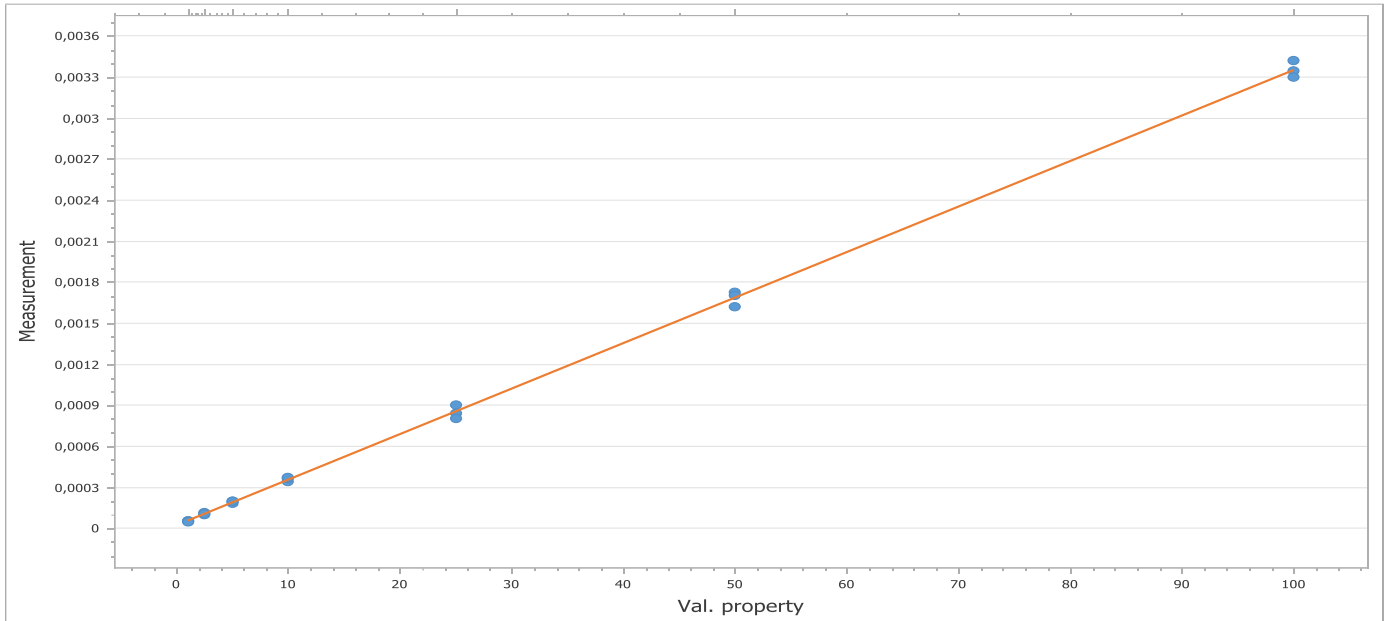

Conclusion: Linearity of the method was confirmed based on correlation and QC Coefficient.

The intercept value of the given straight line meets the acceptance criterion.

Straight line equation:  $y=2,3E-05+3,3E-05*x$ .

Supporting statistics: Intercept (estimate)= 2,3E-05

Slope (estimate)= 3,3E-05

Intercept standard deviation (estimate)= 9E-06

Slope standard deviation (estimate)= 0

Confidence interval for intercept= (4E-06) - (4,2E-05)

Confidence interval for slope= (3,3E-05) - (3,4E-05)

Residual variance (estimate)= 0

Residual standard deviation (estimate)= 3,1E-05

Correlation coefficient= 0,999651

$R^2= 0,999301$

QC coefficient= 3,213863

## Entered data

| Description – Calibration Solution | Val. property – Concentration [µg/L] | Measurement – Peak Area Ratio [1] |
|------------------------------------|--------------------------------------|-----------------------------------|
| Calibration_Standard_001_µg/L      | 1                                    | 0.000301220885984832              |
| Calibration_Standard_001_µg/L      | 1                                    | 0.000315590668612175              |
| Calibration_Standard_001_µg/L      | 1                                    | 0.000275743489368293              |
| Calibration_Standard_002.5_µg/L    | 2.5                                  | 0.00092530804784865               |
| Calibration_Standard_002.5_µg/L    | 2.5                                  | 0.000894601971021729              |
| Calibration_Standard_002.5_µg/L    | 2.5                                  | 0.000913067817410539              |
| Calibration_Standard_005_µg/L      | 5                                    | 0.00196188948727619               |
| Calibration_Standard_005_µg/L      | 5                                    | 0.00190437387626083               |
| Calibration_Standard_005_µg/L      | 5                                    | 0.00191462602449669               |
| Calibration_Standard_010_µg/L      | 10                                   | 0.00351571137708713               |
| Calibration_Standard_010_µg/L      | 10                                   | 0.0038274881571974                |
| Calibration_Standard_010_µg/L      | 10                                   | 0.00364961377472648               |
| Calibration_Standard_025_µg/L      | 25                                   | 0.00880773492972636               |
| Calibration_Standard_025_µg/L      | 25                                   | 0.0086131372408475                |
| Calibration_Standard_025_µg/L      | 25                                   | 0.00880589278576951               |
| Calibration_Standard_050_µg/L      | 50                                   | 0.0172301166295097                |
| Calibration_Standard_050_µg/L      | 50                                   | 0.0180830175733046                |
| Calibration_Standard_050_µg/L      | 50                                   | 0.0173552899063361                |
| Calibration_Standard_100_µg/L      | 100                                  | 0.0377538175596685                |
| Calibration_Standard_100_µg/L      | 100                                  | 0.0357558914264989                |
| Calibration_Standard_100_µg/L      | 100                                  | 0.0374900518453799                |
| Calibration_Standard_250_µg/L      | 250                                  | 0.0891459727316384                |
| Calibration_Standard_250_µg/L      | 250                                  | 0.0918171696884097                |
| Calibration_Standard_250_µg/L      | 250                                  | 0.092211412997743                 |
| Calibration_Standard_500_µg/L      | 500                                  | 0.184737935922539                 |
| Calibration_Standard_500_µg/L      | 500                                  | 0.182856711040399                 |
| Calibration_Standard_500_µg/L      | 500                                  | 0.18093938107748                  |

## Results

| Calculated R | R <sup>2</sup> | Reference R | Calculated QC | Reference QC | Max. acceptable intercept (absolute) | Calculated intercept value | Hypothesis |
|--------------|----------------|-------------|---------------|--------------|--------------------------------------|----------------------------|------------|
| 0.9999       | 0.9998         | 0.99        | 2.198         | 5            | 20                                   | -0.0001                    | Accepted   |

## Chart

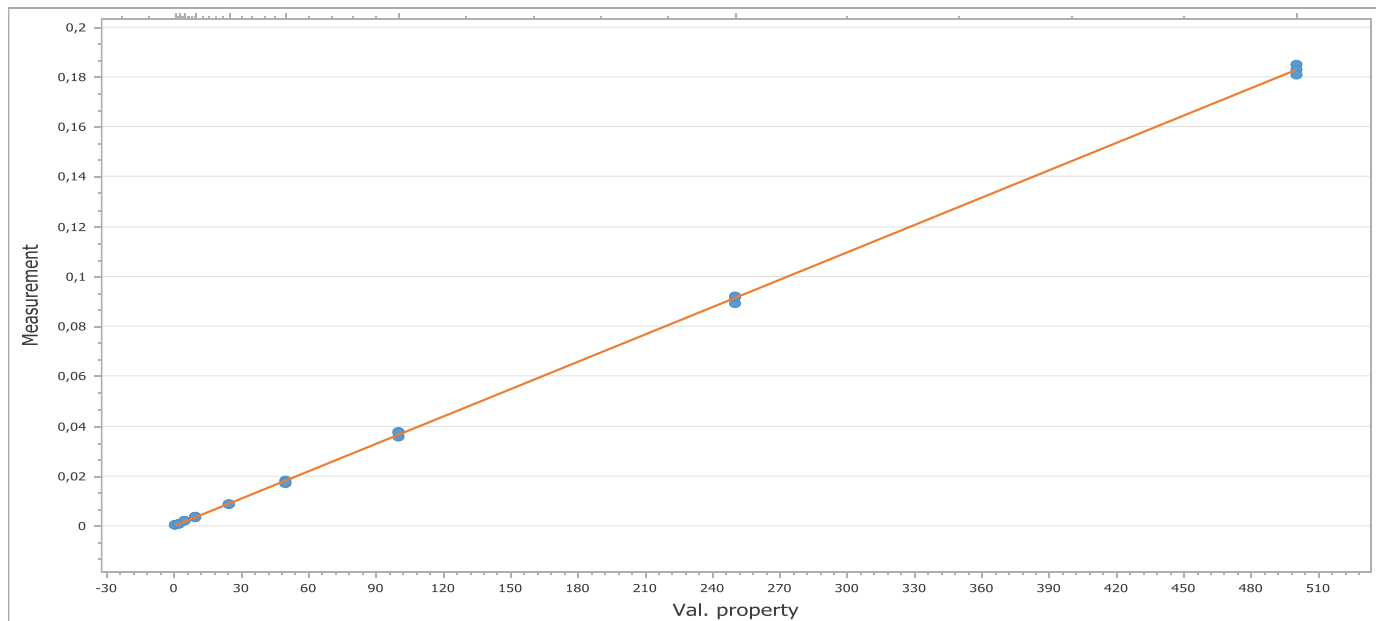

Conclusion: Linearity of the method was confirmed based on correlation and QC Coefficient.

The intercept value of the given straight line meets the acceptance criterion.

Straight line equation:  $y = -0.0001 + 0.0004 * x$ .

Supporting statistics: Intercept (estimate) = -0.00012

Slope (estimate) = 0.000366

Intercept standard deviation (estimate) = 0.000201

Slope standard deviation (estimate) = 1E-06

Confidence interval for intercept = (-0.000535) - (0.000294)

Confidence interval for slope = (0.000364) - (0.000368)

Residual variance (estimate) = 1E-06

Residual standard deviation (estimate) = 0.000857

Correlation coefficient = 0.999899

$R^2 = 0.999798$

QC coefficient = 2.197955
